# Supplementary material for: Bioactive Glasses Containing Strontium or Magnesium Ions to Enhance the Biological Response in Bone Regeneration
Source: MDPI journal article supplement (doi:10.3390/nano13192717), 2023-10-06
Supplement: s1 [file s1]

# Bioactive Glasses Containing Strontium or Magnesium Ions to Enhance the Biological Response in Bone Regeneration

Sílvia Rodrigues Gavinho <sup>1</sup>, Ana Sofia Pádua <sup>2</sup>, Laura Isabel Vilas Holz <sup>3</sup>, Isabel Sá-Nogueira <sup>4,5</sup>, Jorge Carvalho Silva <sup>2</sup>, João Paulo Borges <sup>6</sup>, Manuel Almeida Valente <sup>1,\*</sup> and Manuel Pedro Fernandes Graça <sup>1</sup>

<sup>1</sup> I3N and Physics Department, Aveiro University, 3810-193 Aveiro, Portugal; silviagavinho@ua.pt (S.R.G.); mpfg@ua.pt (M.P.F.G.)

<sup>2</sup> I3N-CENIMAT and Physics Department, NOVA School of Science and Technology, Campus de Caparica, 2829-516 Caparica, Portugal; as.padua@campus.fct.unl.pt (A.S.P.); jcs@fct.unl.pt (J.C.S.)

<sup>3</sup> TEMA and Mechanical Engineering Department, Aveiro University, 3810-193 Aveiro, Portugal; lauraholz@ua.pt

<sup>4</sup> Associate Laboratory i4HB—Institute for Health and Bioeconomy, NOVA School of Science and Technology, NOVA University Lisbon, 2819-516 Caparica, Portugal; isn@fct.unl.pt

<sup>5</sup> UCIBIO—Applied Molecular Biosciences Unit, Department of Life Sciences, NOVA School of Science and Technology, NOVA University Lisbon, 2819-516 Caparica, Portugal

<sup>6</sup> I3N-CENIMAT and Materials Science Department, NOVA School of Science and Technology, Campus de Caparica, 2829-516 Caparica, Portugal; jpb@fct.unl.pt

\* Correspondence: mav@ua.pt

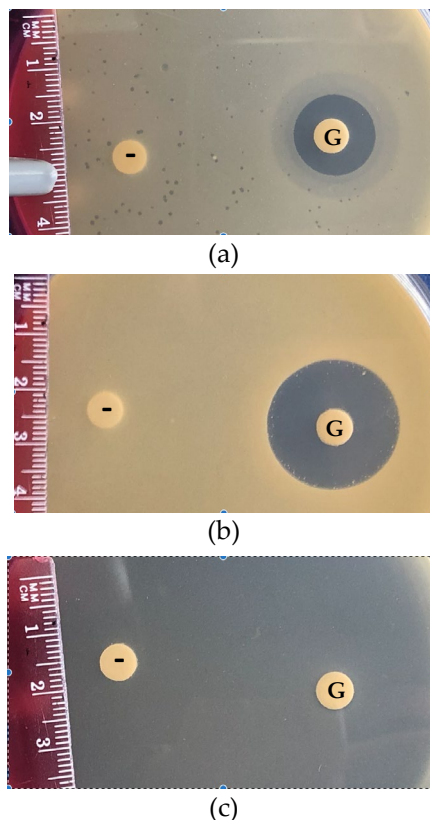

**Figure S1.** Disc diffusion method using (a) *Escherichia coli* K12 DSM498; (b) *Staphylococcus aureus* COL MRSA and (c) *Streptococcus mutans* DSM20523. The *S. mutans* strain used in this work displays

resistance to 10 µg of gentamicin. Discs impregnated with bi-distilled water (-) and gentamicin (10 µg) (G).
